# Supplementary material for: Augmentation of response to nab-paclitaxel by inhibition of insulin-like growth factor (IGF) signaling in preclinical pancreatic cancer models
Source: PubMed Central journal article supplement (PMC5216918; doi:10.18632/oncotarget.9029), 2016-04-26
Supplement: oncotarget-07-46988-s001.pdf [file oncotarget-07-46988-s001.pdf]

## Augmentation of response to nab-paclitaxel by inhibition of insulin-like growth factor (IGF) signaling in preclinical pancreatic cancer models

### Supplementary Material

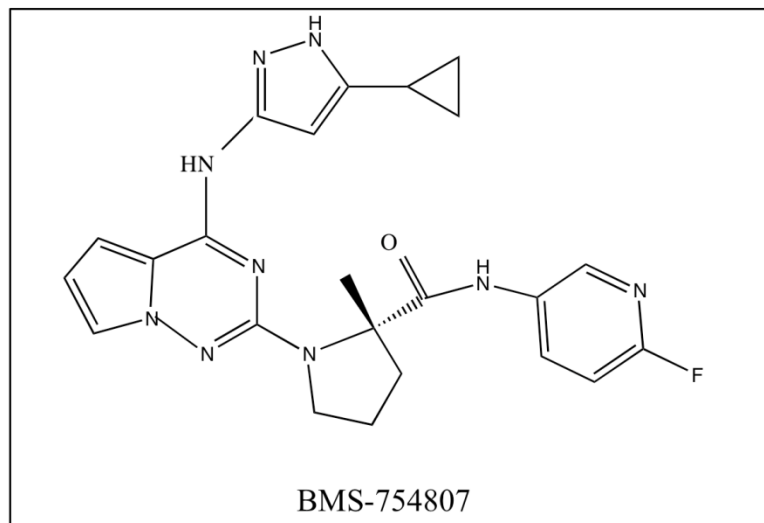

**Supplemental Figure S1:** Chemical structure of BMS-754807. Molecular weight: 461.49

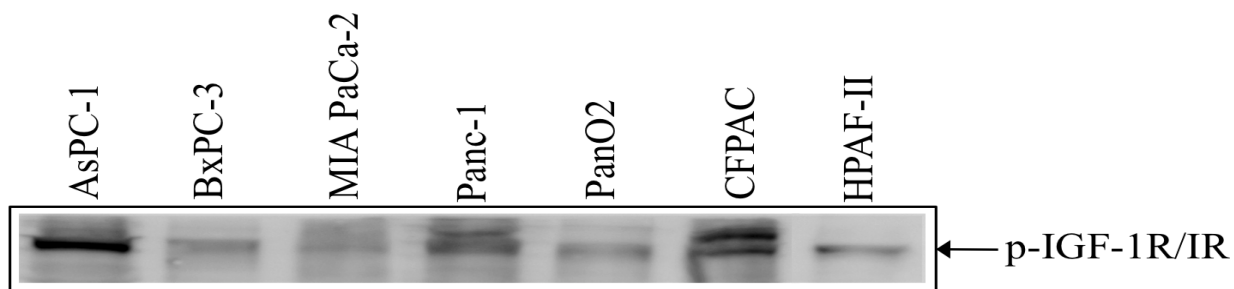

**Supplemental Figure S2:** Expression of phospho-IGF-1R/IR in PDAC cell lines. Total cell extracts of PDAC cells were analyzed by immunoblotting for phospho-IGF-1R/IR protein.
